# Supplementary material
Source: Elsevier journal article supplement (https://usiena-air.unisi.it/retrieve/6b19b561-9805-42a5-93ee-5b7504a6edfb/mmc1.pdf)
Supplement: mmc1 [file mmc1.pdf]

## CovaXiMS study group

| <b>Authors</b>                  | <b>Affiliation</b>                                                                                                                                                                                                                                           |
|---------------------------------|--------------------------------------------------------------------------------------------------------------------------------------------------------------------------------------------------------------------------------------------------------------|
| <b>Alessandro Maglione</b>      | Dipartimento di Scienze Cliniche e Biologiche, Università di Torino Università di Torino                                                                                                                                                                     |
| <b>Alessia Di Sapio</b>         | Department of Neurology, Regina Montis Regalis Hospital, Mondovì, Italy                                                                                                                                                                                      |
| <b>Alessio Signori</b>          | Department of Health Sciences, Section of Biostatistics, University of Genova, Italy                                                                                                                                                                         |
| <b>Alice Laroni</b>             | Department of Neuroscience, Rehabilitation, Ophthalmology, Genetics, Maternal and Child Health (DINOgMI) and Center of Excellence for Biomedical Research (CEBR), University of Genoa, Genoa, Italy<br>IRCCS Ospedale Policlinico San Martino, Genova, Italy |
| <b>Aniello Iovino</b>           | Clinica Neurologica, DSNRO Università Federico II di Napoli                                                                                                                                                                                                  |
| <b>Anna Maria Repice</b>        | Department of Neurology 2, Careggi University Hospital, Florence, Italy                                                                                                                                                                                      |
| <b>Antonio Mannironi</b>        | Department of Neurology, Sant'Andrea Hospital, La Spezia, Italy                                                                                                                                                                                              |
| <b>Antonio Uccelli</b>          | Department of Neuroscience, Rehabilitation, Ophthalmology, Genetics, Maternal and Child Health (DINOgMI) and Center of Excellence for Biomedical Research (CEBR), University of Genoa, Genoa, Italy<br>IRCCS Ospedale Policlinico San Martino, Genova, Italy |
| <b>Carlo Serrati</b>            | Department of Neurology, Imperia Hospital, Imperia, Italy                                                                                                                                                                                                    |
| <b>Carolina Gabri Nicoletti</b> | Multiple Sclerosis Clinical and Research Unit, Department of Systems Medicine, Tor Vergata University and Hospital, Rome, Italy                                                                                                                              |
| <b>Caterina Lapucci</b>         | Department of Neuroscience, Rehabilitation, Ophthalmology, Genetics, Maternal and Child Health (DINOgMI) and Center of Excellence for Biomedical Research (CEBR), University of Genoa, Genoa, Italy<br>IRCCS Ospedale Policlinico San Martino, Genova, Italy |
| <b>Chiara Rosa Mancinelli</b>   | Centro Sclerosi Multipla ASST Spedali Civili di Brescia                                                                                                                                                                                                      |
| <b>Cinzia Cordioli</b>          | Centro Sclerosi Multipla ASST Spedali Civili di Brescia                                                                                                                                                                                                      |
| <b>Daiana Bezzini</b>           | Department of Life Sciences, University of Siena                                                                                                                                                                                                             |
| <b>Daniele Carmagnini</b>       | Centro Sclerosi Multipla Ospedale Binaghi Cagliari - ATS Sardegna, Università di Cagliari                                                                                                                                                                    |
| <b>Davide Brogi</b>             | S.C. Neurologia - Ospedale Santa Corona                                                                                                                                                                                                                      |
| <b>Diego Franciotta</b>         | Autoimmunology Laboratory, IRCCS Ospedale Policlinico San Martino, Genoa, Italy                                                                                                                                                                              |
| <b>Doriana Landi</b>            | Multiple Sclerosis Clinical and Research Unit, Department of Systems Medicine, Tor Vergata University and Hospital, Rome, Italy                                                                                                                              |
| <b>Eduardo Nobile Orazio</b>    | Neuromuscular and Neuroimmunology Service, IRCCS Humanitas Research Hospital, Rozzano, Italy<br>Department of Medical Biotechnology and Translational Medicine, Milan University, Milan, Italy                                                               |
| <b>Eleonora Cocco</b>           | Centro Sclerosi Multipla Ospedale Binaghi Cagliari - ATS Sardegna, Università di Cagliari                                                                                                                                                                    |
| <b>Elisabetta Signoriello</b>   | Centro Sclerosi Multipla, II Clinica Neurologica, Università della Campania Luigi Vanvitelli                                                                                                                                                                 |
| <b>Enri Nako</b>                | Department of Neurology, Regina Montis Regalis Hospital, Mondovì, Italy                                                                                                                                                                                      |
| <b>Ester Assandri</b>           | Neuroimmunology, Center for Multiple Sclerosis, Cerebrovascular Department, Neurological Unit, ASST Crema                                                                                                                                                    |
| <b>Fabiana Marinelli</b>        | Multiple Sclerosis Center, Fabrizio Spaziani Hospital, via Armando Fabi, Frosinone – Italy                                                                                                                                                                   |
| <b>Federica Baldi</b>           | Department of Neurosciences, Rehabilitation, Ophthalmology, Genetics, Maternal and Child Health, University of Genoa, Genoa, Italy                                                                                                                           |
| <b>Filippo Ansaldo</b>          | Planning, Epidemiology and Prevention Unit, A.Li.Sa. Liguria Health Authority, Genoa, Italy.                                                                                                                                                                 |

## CovaXiMS study group

|                                   |                                                                                                                                                                                                                                  |
|-----------------------------------|----------------------------------------------------------------------------------------------------------------------------------------------------------------------------------------------------------------------------------|
|                                   | IRCCS San Martino Hospital, Genoa, Italy.<br>Department of Health Sciences, University of Genoa, Genoa, Italy.                                                                                                                   |
| <b>Francesca Bovis</b>            | Department of Health Sciences, Section of Biostatistics, University of Genova, Italy                                                                                                                                             |
| <b>Francesca Caleri</b>           | MS Center, Department of Neurology, F. Tappeiner Hospital Meran (BZ), Italy                                                                                                                                                      |
| <b>Gabriele Siciliano</b>         | Department of Clinical and Experimental Medicine, Neurology Unit, University of Pisa, Italy                                                                                                                                      |
| <b>Gaia Cola</b>                  | Multiple Sclerosis Clinical and Research Unit, Department of Systems Medicine, Tor Vergata University and Hospital, Rome, Italy                                                                                                  |
| <b>Germana Perego</b>             | SC Neurologia ASL 4 Chiavarese                                                                                                                                                                                                   |
| <b>Giacomo Lus</b>                | Centro Sclerosi Multipla, II Clinica Neurologica, Università della Campania Luigi Vanvitelli                                                                                                                                     |
| <b>Giampaolo Brichetto</b>        | AISM Rehabilitation Center, Genoa, Italy                                                                                                                                                                                         |
| <b>Giancarlo Icardi</b>           | IRCCS San Martino Hospital, Genoa, Italy.<br>Department of Health Sciences, University of Genoa, Genoa, Italy.                                                                                                                   |
| <b>Gianmarco Bellucci</b>         | Centre for Experimental Neurological Therapies (CENTERS), Department of Neurosciences, Mental Health and Sensory Organs, Sapienza University of Rome, Italy                                                                      |
| <b>Giorgio Da Rin</b>             | Laboratory Medicine, IRCCS Ospedale Policlinico San Martino, Genoa, Italy.                                                                                                                                                       |
| <b>Girolama Alessandra Marfia</b> | Multiple Sclerosis Clinical and Research Unit, Department of Systems Medicine, Tor Vergata University and Hospital, Rome, Italy<br>Neurology Unit, IRCCS NEUROMED, Pozzilli, IS, Italy                                           |
| <b>Giulia Vazzoler</b>            | UOC Neurologia e Centro SM Fondazione Istituto G. Giglio, Cefalù <sup>1</sup>                                                                                                                                                    |
| <b>Giuseppe Liberatore</b>        | Neuromuscular and Neuroimmunology Service, IRCCS Humanitas Research Hospital, Rozzano, Italy                                                                                                                                     |
| <b>Giuseppe Trivelli</b>          | SC Neurologia ASL 4 Chiavarese                                                                                                                                                                                                   |
| <b>Graziella Callari</b>          | UOC Neurologia e Centro SM Fondazione Istituto G. Giglio, Cefalù                                                                                                                                                                 |
| <b>Ilaria Gandoglia</b>           | Neurology Unit, Galliera Hospital                                                                                                                                                                                                |
| <b>Ilaria Maietta</b>             | Department of Health Sciences, Section of Biostatistics, University of Genova, Italy                                                                                                                                             |
| <b>Irene Schiavetti</b>           | Department of Health Sciences, Section of Biostatistics, University of Genova, Italy                                                                                                                                             |
| <b>Jessica Frau</b>               | Centro Sclerosi Multipla Ospedale Binaghi Cagliari - ATS Sardegna, Università di Cagliari                                                                                                                                        |
| <b>Laura Sticchi</b>              | Department of Health Sciences (Dissal), University of Genoa, Genoa, Italy.<br>Hygiene Unit, IRCCS Policlinico San Martino Hospital, Genoa, Italy.                                                                                |
| <b>Livia Pasquali</b>             | Department of Clinical and Experimental Medicine, Neurology Unit, University of Pisa, Italy                                                                                                                                      |
| <b>Lorena Lorefice</b>            | Centro Sclerosi Multipla Ospedale Binaghi Cagliari - ATS Sardegna, Università di Cagliari                                                                                                                                        |
| <b>Luca Carmisciano</b>           | Department of Health Sciences, Section of Biostatistics, University of Genova, Italy                                                                                                                                             |
| <b>Lucia Ruggiero</b>             | Clinica Neurologica, DSNRO Università Federico II di Napoli                                                                                                                                                                      |
| <b>Marcello Manzano</b>           | Divisione di Neurologia, Ospedale San Paolo, Savona                                                                                                                                                                              |
| <b>Marco Salvetti</b>             | Centre for Experimental Neurological Therapies (CENTERS), Department of Neurosciences, Mental Health and Sensory Organs, Sapienza University of Rome, Italy<br>IRCCS Istituto Neurologico Mediterraneo Neuromed, Pozzilli, Italy |
| <b>Margherita Monti Bragadin</b>  | AISM Rehabilitation Center, Genoa, Italy                                                                                                                                                                                         |

## CovaXiMS study group

|                                |                                                                                                                                                                                                                                                              |
|--------------------------------|--------------------------------------------------------------------------------------------------------------------------------------------------------------------------------------------------------------------------------------------------------------|
| <b>Maria Chiara Buscarinu</b>  | Centre for Experimental Neurological Therapies (CENTERS), Department of Neurosciences, Mental Health and Sensory Organs, Sapienza University of Rome, Italy                                                                                                  |
| <b>Maria Gagliardi</b>         | Department of Neurosciences, Rehabilitation, Ophthalmology, Genetics, Maternal and Child health, Genova, Italy                                                                                                                                               |
| <b>Maria Laura Stromillo</b>   | Clinica Neurologica e Malattie Neurometaboliche, Università degli Studi di Siena                                                                                                                                                                             |
| <b>Maria Pia Sormani</b>       | Department of Health Sciences, Section of Biostatistics, University of Genova, Italy<br>IRCCS Ospedale Policlinico San Martino, Genova, Italy/Department of Health Sciences, Section of Biostatistics, University of Genova, Italy                           |
| <b>Maria Teresa Ferrò</b>      | Neuroimmunology, Center for Multiple Sclerosis, Cerebrovascular Department, Neurological Unit, ASST Crema                                                                                                                                                    |
| <b>Maria Teresa Rilla</b>      | Department of Neurology, Imperia Hospital, Imperia, Italy                                                                                                                                                                                                    |
| <b>Marinella Clerico</b>       | Dipartimento di Scienze Cliniche e Biologiche, Università di Torino Università di Torino                                                                                                                                                                     |
| <b>Mario Alberto Battaglia</b> | Research Department, Italian Multiple Sclerosis Foundation, Genoa, Italy                                                                                                                                                                                     |
| <b>Marta Ponzano</b>           | Department of Life Sciences, University of Siena, Siena, Italy<br>Department of Health Sciences, Section of Biostatistics, University of Genova, Italy                                                                                                       |
| <b>Marzia Fronza</b>           | Centro Sclerosi Multipla Ospedale Binaghi Cagliari - ATS Sardegna, Università di Cagliari                                                                                                                                                                    |
| <b>Massimo Del Sette</b>       | Neurology Unit, Galliera Hospital                                                                                                                                                                                                                            |
| <b>Matilde Inglese</b>         | Department of Neuroscience, Rehabilitation, Ophthalmology, Genetics, Maternal and Child Health (DINOEMI) and Center of Excellence for Biomedical Research (CEBR), University of Genoa, Genoa, Italy<br>IRCCS Ospedale Policlinico San Martino, Genova, Italy |
| <b>Matteo Scialabba</b>        | U.O. Neurologia e Centro Sclerosi Multipla - Fondazione Istituto G. Giglio Cefalù (PA)                                                                                                                                                                       |
| <b>Michele Bedognetti</b>      | Centro Sclerosi Multipla S.C. Neurologia Asl 3 Genovese                                                                                                                                                                                                      |
| <b>Monica Ulivelli</b>         | Department of Medicine, Surgery and Neuroscience, University of Siena                                                                                                                                                                                        |
| <b>Nicola De Rossi</b>         | Centro Sclerosi Multipla ASST Spedali Civili di Brescia                                                                                                                                                                                                      |
| <b>Nicola De Stefano</b>       | Clinica Neurologica e Malattie Neurometaboliche, Università degli Studi di Siena                                                                                                                                                                             |
| <b>Paola Gazzola</b>           | Centro Sclerosi Multipla S.C. Neurologia Asl 3 Genovese                                                                                                                                                                                                      |
| <b>Rachele Bigi</b>            | Centre for Experimental Neurological Therapies (CENTERS), Department of Neurosciences, Mental Health and Sensory Organs, Sapienza University of Rome, Italy                                                                                                  |
| <b>Raffaele Dubbioso</b>       | Clinica Neurologica, DSNRO Università Federico II di Napoli                                                                                                                                                                                                  |
| <b>Roberta Reniè</b>           | Centre for Experimental Neurological Therapies (CENTERS), Department of Neurosciences, Mental Health and Sensory Organs, Sapienza University of Rome, Italy                                                                                                  |
| <b>Rosa Iodice</b>             | Clinica Neurologica, DSNRO Università Federico II di Napoli                                                                                                                                                                                                  |
| <b>Sabrina Fabbri</b>          | Centro Sclerosi Multipla S.C. Neurologia Asl 3 Genovese                                                                                                                                                                                                      |
| <b>Sarah Rasia</b>             | Centro Sclerosi Multipla ASST Spedali Civili di Brescia                                                                                                                                                                                                      |
| <b>Simona Rolla</b>            | Dipartimento di Scienze Cliniche e Biologiche, Università di Torino Università di Torino                                                                                                                                                                     |
| <b>Stefan Platzgummer</b>      | Laboratory of Clinical Pathology, F. Tappeiner Hospital Meran (BZ), Italy                                                                                                                                                                                    |
| <b>Susanna Cordera</b>         | Department of Neurology, Ospedale Regionale, Aosta, Italy                                                                                                                                                                                                    |
| <b>Tiziana Tassinari</b>       | S.C. Neurologia - Ospedale Santa Corona Pietra Ligure (Sv)                                                                                                                                                                                                   |

**CovaXiMS study group**

---

**Valentina Carlini**                      Centro Sclerosi Multipla S.C. Neurologia Asl 3 Genovese

---
